1           **Human deleterious mutation rate implies high fitness variance, with declining mean fitness**  
2                           **compensated by rarer beneficial mutations of larger effect**

3                           Joseph Matheson<sup>1,2</sup>, Jason Bertram<sup>1,3</sup>, Joanna Masel<sup>1</sup>

4           <sup>1</sup>Department of Ecology and Evolutionary Biology, University of Arizona, Tucson, AZ, 85721, USA

5           <sup>2</sup>Department of Ecology, Behavior, and Evolution, University of California San Diego, San Diego, CA,  
6           92093, USA

7           <sup>3</sup>Department of Mathematics, University of Western Ontario, London ON, Canada

8           **Corresponding author:** Joanna Masel

9           **Abstract**

10          Each new human has an expected  $U_d = 2 - 10$  new deleterious mutations. This deluge of deleterious  
11          mutations cannot all be purged, and therefore accumulate in a declining fitness ratchet. Using a novel  
12          simulation framework designed to efficiently handle genome-wide linkage disequilibria across many  
13          segregating sites, we find that rarer, beneficial mutations of larger effect are sufficient to compensate  
14          fitness declines due to the fixation of many slightly deleterious mutations. Drift barrier theory posits a  
15          similar asymmetric pattern of fixations to explain ratcheting genome size and complexity, but in our  
16          theory, the cause is  $U_d > 1$  rather than small population size. In our simulations,  $U_d \sim 2 - 10$  generates  
17          high within-population variance in relative fitness; two individuals will typically differ in fitness by 15-  
18          40%.  $U_d \sim 2 - 10$  also slows net adaptation by ~13%-39%. Surprisingly, fixation rates are more sensitive  
19          to changes in the beneficial than the deleterious mutation rate, e.g. a 10% increase in overall mutation rate  
20          leads to faster adaptation; this puts to rest dysgenic fears about increasing mutation rates due to rising  
21          paternal age.

22          **Keywords:** mutation load; Muller's ratchet, Ohta's ratchet, chromosome number, background selection,  
23          genetic hitchhiking.

## 24 **Introduction**

25 The average human begins life with upwards of a hundred new mutations not found in their parents  
26 (Lynch, 2010b). Lescage et al. (2012) assumed that mutations are deleterious only in the 55% of the  
27  $6 \times 10^9$  diploid genome that is not dominated by transposable elements, which evolves due to this  
28 constraint at 94.3% of the rate, at a point mutation rate of  $1.1 \times 10^{-8}$ ; this yields an estimated rate of  
29 deleterious mutations of  $0.55 \times 6 \times 10^9 \times 0.057 \times 1.1 \times 10^{-8} = 2.1$  per replication. This estimate is conservative:  
30 some mutations to transposable element regions are deleterious, more recent estimates of the human point  
31 mutation rate are slightly higher at  $\sim 1.25 \times 10^{-8}$  (Awadalla et al., 2010; Roach et al., 2010), and non-point  
32 mutations and beneficial mutations are neglected. Some therefore argue that the deleterious mutation rate  
33 is as high as 10 (Kondrashov, 2017). Mutation rates of this order are not unique to humans (Haag-Liautard  
34 et al., 2007; Popovic et al., 2023).

35 Given such an extraordinarily high deleterious mutation rate, geneticists have long worried about the  
36 effects of the resulting “mutation load” on human health (Crow, 1997; Lynch, 2016; Muller, 1950; Vy et  
37 al., 2021). Classical infinite sites population genetics theory in the absence of epistasis or linkage  
38 disequilibrium predicts that segregating deleterious mutations reduce fitness from 1 (maximum relative  
39 fitness for a mutationless individual) to  $e^{-Ud}$ , which means that human fitness is reduced to only 13% of  
40 what it could be without deleterious mutations (Haldane, 1937). Matters are worse when we consider the  
41 possibility that deleterious mutations might fix. Since removing a single deleterious mutation requires on  
42 average one ‘selective death’ (Matheson et al., 2023), selection cannot keep up with mutation for  
43 deleterious mutation rates above one, resulting in the progressive accumulation (“Ohta’s ratchet” (Ruan et  
44 al., 2020)) of slightly deleterious fixations, even in sexual populations.

45 Partial solutions have been proposed to the puzzle of how populations such as humans persist in the face  
46 of such high deleterious mutation rates. Firstly, mutation load is sometimes defined as  $L = W_{max} - \bar{W}$ ,  
47 where  $W_{max}$  represents the fitness of a completely mutationless individual (Haldane, 1937). Since this

48 hypothetical deleterious-mutation-free individual has almost certainly never existed, mutation load  
49 concerns depend on assumptions about this hypothetical individual's fitness (Agrawal & Whitlock, 2012).  
50 If a mutation-free human could average a hundred offspring, then reducing human fitness to 13% of that  
51 optimum would pose no threat. However, this does not resolve the issue of the progressive accumulation  
52 of load.

53 Secondly, some load presumably affects intrinsically relative fitness traits, such as mating success or  
54 intraspecific competition for resources, rather than absolute survival and fecundity (Agrawal & Whitlock,  
55 2012). Defining load in terms of relative rather than absolute fitness means that the appropriate  $W_{max}$  is  
56 the fittest individual in the population, not a mutationless individual. High load then represents large  
57 differences in competitive ability among members of a population, not a threat to population survival.  
58 However, at the molecular level, many deleterious mutations simply break functionality. While the  
59 biggest immediate impact of impaired cellular metabolism might be on relative competitiveness, inferior  
60 functioning at the molecular level will inevitably also have absolute effects. While some load might be  
61 strictly relative, some will be absolute. Endlessly deteriorating relative fitness is anyway a problematic  
62 formulation of evolution.

63 Thirdly, load is much lower if the effects of most deleterious mutations are restricted to their impact on  
64 traits under stabilizing selection (Charlesworth, 2013). In a trait-based model, all mutations modify the  
65 value of a higher-level trait, and load is determined by the distance between this value and some optimum  
66 value. When the trait deviates far from the optimum, the fraction of mutations that are beneficial rises  
67 much higher, eventually approaching 50% in Fisher's geometric model (Fisher, 1930). At equilibrium,  
68 this model suggests quite small loads (only about 5% for humans) (Charlesworth, 2013). But again, at the  
69 molecular level at which new mutations actually occur, a DNA change in a protein is far more likely to  
70 simply reduce general functionality than to slightly modify a higher-order trait, suggesting that  
71 unconditionally deleterious mutations represent a substantial portion, if not the vast majority, of new  
72 mutations (Karczewski et al., 2020).

73 Lastly, load could be cleared faster than it arises even for  $U_d > 1$  if epistasis among deleterious mutations  
74 was on average synergistic (Kimura & Maruyama, 1966; Kondrashov, 1995a, 1995b). Synergistic epistasis  
75 allows one selective death to remove greater than one deleterious mutation on average, by increasing  
76 variance in fitness above that predicted in the absence of epistasis from variance in mutation number.  
77 Unfortunately, empirical data has not supported significant synergistic epistasis, suggesting that the  
78 average interaction between new deleterious mutations is close to multiplicative (Kouyos et al., 2007).

79 The central unresolved problem is that when  $U_d > 1$ , deleterious mutations fix at a higher rate than they  
80 revert (Kondrashov, 1995b), creating an endless series of deterioration. Some proportion of these  
81 mutations may affect traits under stabilizing selection or relative fitness traits, but some portion has an  
82 absolute impact, such that the system is constantly degraded.

83 This fundamental issue shows up in studies that attempt to model and/or infer differences in load between  
84 populations. Such studies take a variety of questionable strategies to deal with the tendency for even their  
85 large control populations to degrade. For example, some studies periodically re-normalize simulated  
86 fitness data to cosmetically remove ongoing degradation (e.g. compare Fig. S2 to Fig. 2 in (Simons et al.,  
87 2014)). Others use  $U_d < 1$ , e.g. (Kyriazis et al., 2021). Others treat one-locus models (Gravel, 2016; Koch  
88 & Novembre, 2017; Lohmueller et al., 2008; Simons et al., 2014) despite the fact that independent  
89 evolution even of unlinked sites breaks down for  $U_d > 1$  (Matheson & Masel, 2023). The lack of a sound  
90 baseline model is an obstacle to reliable inference.

91 Indefinite deterioration can be prevented by design by using a finite sites model, but this makes load far  
92 higher than an 87% fitness reduction. Consider two alleles at each locus, one beneficial and one  
93 deleterious, with some equilibrium probability of encountering each. Sites with small selective differences  
94 will often be found in the deleterious state. When parameterized for humans, this model predicts a load  
95 with one hundred “lethal equivalents” in the exponent, prompting the expression that we should have  
96 ‘died one hundred times over’ (Kondrashov, 1995a).

97 When not all deleterious mutations can be purged, which ones fix will depend on their selection  
98 coefficient. A ‘drift barrier’ (Ohta, 1973; Sung et al., 2012) describes the minimum magnitude of  
99 deleterious mutation that can be reliably purged. Overwhelmingly high deleterious mutation rates will  
100 increase background selection even in the absence of linkage (Matheson & Masel, 2023), lowering the  
101 effective population size down to a point where a greater fraction of deleterious mutations will fix,  
102 including those of larger effect sizes.

103 Our hypothesis is that biological populations are not at equilibrium, and that nothing stops or reverts  
104 Ohta’s ratchet, i.e. the steady accumulation of slightly deleterious mutations. Instead, we hypothesize that  
105 the reason that populations persist in the face of ongoing mutational degradation is that rarer, large-effect  
106 beneficial mutations compensate for the fitness lost through many small-effect deleterious fixations. This  
107 view arises naturally from an infinite sites model with a distribution of fitness effects. Deleterious  
108 mutations with smaller  $s$  (Kimura, 1962) and beneficial mutations with larger  $s$  (Haldane, 1927) are more  
109 likely to fix. An illustrative example of this hypothesis is many proteins accumulating small deleterious  
110 mutations that slightly inhibit folding, that are compensated for by a novel or improved or overexpressed  
111 chaperone protein (Fares et al., 2002). This illustrates how, while the flux of beneficial fixations will more  
112 than cancel out the flux of deleterious fixations, this does not imply detailed balance at individual loci.  
113 Empirical evidence of this pattern of asymmetric adaptation to deleterious load has been observed in  
114 influenza (Koelle & Rasmussen, 2015), illustrating how finite sites models of detailed balance poorly  
115 describe biological populations undergoing adaptation within a vast genotype space of the possible.  
116 Whitlock (2000) previously developed this idea, and found that populations remained stable down to a  
117 critical effective population size of barely over 100. However, this optimistic result ignored the effects of  
118 linkage disequilibrium. The flux of fixations of beneficial mutations is lower than it would be if they were  
119 evolving independently; it is reduced both by clonal interference (negative linkage disequilibrium with  
120 other beneficial mutations) (Hill & Robertson, 1966) and by background selection (positive linkage

121 disequilibrium with deleterious mutations) (Assaf et al., 2015; Good & Desai, 2014; Péniisson et al., 2017).  
122 These same factors also cause more deleterious mutations to fix.

123 The full complexities of multilocus linkage disequilibrium can be captured only by simulation. Most  
124 forward time simulation methods hold a product such as  $sN$  constant, and rescale  $N$  to be smaller and  $s$  to  
125 be larger in order to accelerate computation (Haller & Messer, 2017). The problem with this is that it  
126 reduces the number of segregating mutations, and so understates the impact of linkage disequilibria. We  
127 instead model the evolution of load in populations with a census population size of 20,000, which we find  
128 gives rise to a realistic level of human neutral diversity ( $N_e \sim 7500$ ), allowing linkage disequilibrium to  
129 emerge appropriately. We introduce two new simulation techniques to overcome the computational  
130 challenges of such an approach: ‘linkage blocks’ that avoid the need to track every single segregating site  
131 in order to perform fitness calculations, and binary indexed trees that allow both birth-death and selection  
132 processes to occur in  $O(\log N)$  time. While linkage blocks allow us to rapidly compute individual  
133 fitnesses without real-time tracking of every mutation, we still need information about all fixed mutations  
134 at the end of the run, in order to determine the degree of asymmetry of effect sizes between fixed  
135 beneficial and deleterious mutations. To obtain this, we use tree-sequence recording (Kelleher et al.,  
136 2018), which increases our runtime substantially, while still being much faster than basing fitness  
137 calculations on individual mutations.

138 Our goal is to determine whether beneficial mutations are sufficient to recover fitness lost to Ohta’s  
139 ratchet in the crucial case of realistic mutation rates and linkage disequilibrium. Our metric is fitness flux,  
140 i.e. the mean rate of change in relative fitness in the population (Gravel, 2016; Mustonen & Lässig, 2010).  
141 If asymmetric adaptation is sufficient to explain population persistence in the face of accumulating  
142 deleterious mutations, then we expect to see positive fitness flux even in simulated populations with  
143 conservatively low estimates for the rates of beneficial mutations and their effect sizes. We also use our  
144 model to predict the consequences of a recent increase in the human mutation rate for human populations

145 (Muller, 1950), and the consequences of a high deleterious mutation for variation in fitness within  
146 populations.

## 147 **Methods**

148 Our individual-based forward-time simulations were written in C. Each individual has two characteristics:  
149 a genome, and a fitness value derived from it. Each individual's genome is represented as two haplotypes,  
150 each an array of  $L$  non-recombining 'linkage blocks', divided into 23 chromosomes. Each linkage block  
151 consists of a floating-point variable  $l_j$ , which summarizes the fitness effects of all mutations that occurred  
152 in the history of that linkage block, such that  $l_j = \prod_i(1 + s_i)$ . We assume a multiplicative form of co-  
153 dominance and no epistasis, such that  $w_i = \prod_{j=1}^L(l_{j,1}) \prod_{j=1}^L(l_{j,2})$  where  $l_{j,1}$  and  $l_{j,2}$  refer to the effect of  
154 linkage block  $j$  in haplotypes 1 and 2, respectively. Note that this computationally convenient choice is  
155 not precisely equivalent to a typical codominance model, where  $1 + s_i$  is the fitness of a homozygote and  
156  $1 + s_i h_i$  is the fitness of a heterozygote. While co-dominance is unrealistic for strongly deleterious  
157 mutations, which are often highly recessive, it is reasonable for the small-effect deleterious mutations  
158 which drive Ohta's ratchet (Agrawal & Whitlock, 2011; Simmons & Crow, 1977; Yang et al.,  
159 2017).

160 In addition to independent assortment of chromosomes, recombination occurs at hotspots between linkage  
161 blocks via crossing-over events between homologous chromosomes. We simulate exactly two  
162 recombination events per chromosome per meiosis, matching data for humans (Pardo-Manuel De Villena  
163 & Sapienza, 2001), although we don't explicitly simulate a centrosome. Representing a genome as a set  
164 of 'linkage blocks' is a good approximation of population genetics in non-microbial species (Good et al.,  
165 2014; Neher et al., 2013; Weissman & Hallatschek, 2014). Realistic values of  $L$  in humans are in the  
166 range of  $10^5$ - $10^6$  (Altshuler et al., 2008; Belmont et al., 2005; Coop et al., 2008; Pratto et al.,  
167 2018; Wall & Pritchard, 2003). Once  $L \geq 50 \times 23 = 1150$ , results converge (Supplementary Figure

168 1), so for computational efficiency we use  $L = 50 \times 23$ . This simplification should overestimate the  
169 effect of linkage between selected mutations, which is conservative with respect to the ability of  
170 beneficial mutations to counteract load.

171 Following recombination, we sample the number of new deleterious mutations in the gamete from a  
172 Poisson distribution with mean  $U_d$ . Our distribution of fitness effects is based on a large empirical study  
173 of Europeans (Kim et al., 2017), who fitted a gamma distribution for  $2N_e s h$  with mean  $-224.33$ , shape  
174 parameter  $\alpha = 0.169$  and scale parameter  $\beta = 1327.4$ . After drawing a value of  $2N_e s h$  from this  
175 distribution, we rescale to  $s h$  using their inferred  $N_e = 11,823$ . We use the  $s h$  value drawn from this  
176 distribution as our  $s_i$  value. We sample the number of new beneficial mutations from a Poisson  
177 distribution with mean  $U_b$ , and fitness effects drawn from an exponential distribution with mean  $s_b$   
178 (again, this is the fitness effect in the heterozygote). We explore a range of values for  $U_b$  and  $s_b$  that we  
179 consider *a priori* plausible:  $U_b \sim 0.0001-0.01$  and  $s_b \sim 0.001-0.01$ .

180 We simulate a Moran model with constant population size  $N$ . An individual chosen uniformly at random  
181 dies each time step and is replaced by a child produced by two parents, who are chosen with probability  
182 proportional to their fitness  $w_i$ . Each generation consists of  $N$  time steps. The fitnesses of the population  
183 are stored in an unsorted array — in a naïve implementation, exchanging an element to represent a birth  
184 and death would be rapid, but sampling proportional to fitness would be  $O(N)$ . The current fastest  
185 forward-time genetic simulation tools for large population sizes (e.g. both fwdpy (Thornton, 2014,  
186 2019)) and SLiM (Haller & Messer, 2022) preprocess cumulants each generation in a Wright-Fisher  
187 model; this speeds up sampling from the fitness array, and while the processing algorithm is  $O(N)$ , it only  
188 needs to be performed once per generation. We instead use a binary indexed tree (Fenwick, 1994) to  
189 sample fitnesses efficiently according to the cumulative probability distribution — both updating and  
190 sampling from the tree are  $O(\log N)$ . Our scheme is expected to have similar efficiency but is intended to  
191 be useful for future expansions of this approach to absolute fitness and more complex life history models



192 (Bertram & Masel, 2019; Matheson et al., 2023), e.g. to allow better treatment of reproductive  
193 compensation (Ober et al., 1999).

194 We initialize the population with mutationless individuals, then conduct a ‘burn-in’ phase during which  
195 variation increases to stable levels (Supplementary Figure 2). We end the burn-in phase 500 generations  
196 after a linear regression of the variance in fitness over the last 200 generations produces a slope less than  
197 an arbitrarily chosen low value of  $0.007/N$  that we visually confirmed to perform well (e.g.  
198 Supplementary Figure 2). The length of the burn-in phase does not strongly depend on  $N$  (Supplementary  
199 Figure 3).

200 We calculate the net fitness flux from each simulation as the slope of the regression of log mean  
201 population fitness on time after burn-in (Supplementary Figure 2, black slope following dashed line). To  
202 numerically solve for a specified net fitness flux for Figure 1, we varied  $s_b$  while holding  $U_b$  constant.  
203 Our algorithm finds values of  $s_b$  that bracket the target net fitness flux, and then uses a bisection method  
204 until it finds a value of  $s_b$  that is within  $\pm 0.00005$  of the target. In practice, there was little stochasticity  
205 in the regression slope (which averages out stochasticity in the timecourse), and so this relatively  
206 deterministic method performed well.

207 Although the census population size  $N$  is a parameter of our model, the effective population size  $N_e$  is not,  
208 but rather emerges over the course of a given simulation. To estimate it, we used the tree-sequence  
209 recording tools from the tskit package (Kelleher et al., 2018), and used msprime (Baumdicker et al.,  
210 2022) to retroactively add neutral mutations after each simulation. We did this only for one parameter  
211 combination involving realistically high  $N$ , due to the significant computational cost of this procedure;  
212 this was 23 chromosomes, 50 linkage blocks per chromosome,  $N = 20,000$ ,  $U_d = 2$ ,  $U_b = 0.002$ , and  
213  $s_b = 0.0025$ . These parameter values produce only a small excess of adaptation above that needed to  
214 counter Ohta’s ratchet (Figure 1). We calculate  $N_e$  using neutral heterozygosity under an infinite-alleles

215 model. The choice of neutral mutation rate will not affect estimated  $N_e$ ; we arbitrarily chose  $1.0 \times 10^{-6}$   
216 per linkage block, or  $1.15 \times 10^{-4}$  per haploid genome. This produced  $N_e \sim 7500$ , on the order of  
217 effective population sizes inferred for ancestral human populations (Tenesa et al., 2007). For  
218 comparison, similar simulations with  $U_b = 0$  (i.e. with background selection alone and declining relative  
219 fitness), produce  $N_e \sim 16,000$  (Matheson & Masel, 2023).

220 Tree sequence recording also tracks all non-neutral mutations, so that we can identify those that fixed and  
221 thus determine the degree of asymmetry in the effect sizes of fixed mutations. Note that without tree-  
222 sequence recording, this information would be inaccessible due to the way we summarize the fitness of  
223 many mutations within linkage blocks. However, using tree-sequence recording for all non-neutral  
224 mutations significantly increases the computation time of simulations. When we are solving for the  
225 parameters that produce a target value of net fitness flux, we therefore do not use tree sequence recording.

## 226 **Results**

227 Achieving positive mean population fitness flux depends primarily on the mean beneficial effect size, not  
228 on the beneficial mutation rate (Figure 1), in agreement with prior theoretical work (Weissman & Barton,  
229 2012). The black line in Figure 1 shows the parameter values for which there is exactly zero change in  
230 fitness. The entire range of  $U_b$  shown in Figure 1 is likely conservative, while the dashed red lines show  
231 the range for  $\bar{s}_b$  (the mean beneficial effect in heterozygotes) that we deemed *a priori* plausible. In the  
232 absence of environmental change, population persistence is possible for  $\bar{s}_b > \sim 0.001 - 0.003$ ,  
233 depending on assumptions about  $U_b$ . While there is great uncertainty in the true values of these  
234 parameters, this range seems entirely plausible.

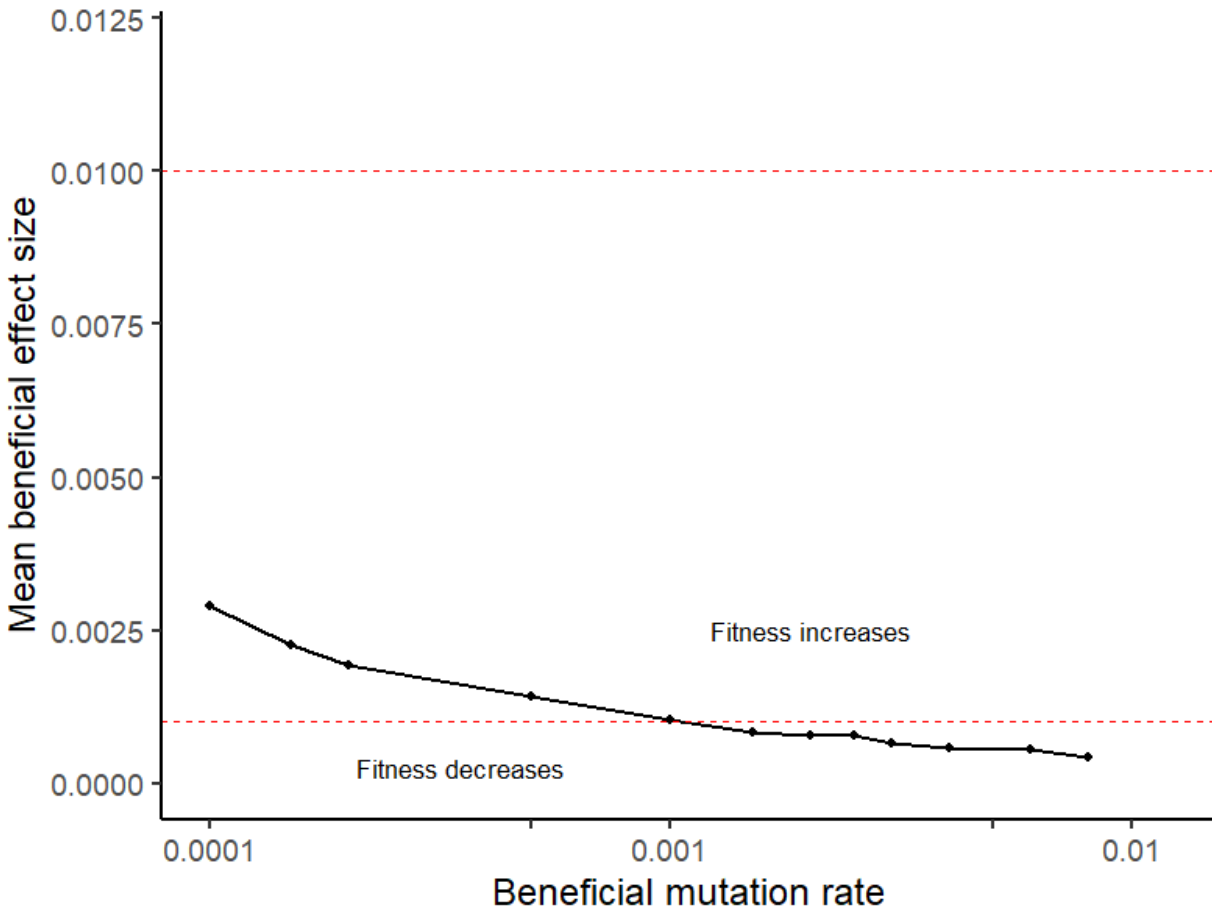

235

236 **Figure 1. Relatively rare and mild beneficial mutations are sufficient to counteract a deluge of**  
237 **slightly deleterious mutations accumulating under Ohta's ratchet.** Black line shows combinations of  
238 beneficial mutation parameters that produce zero net fitness flux. All populations simulated with  $N =$   
239 20,000, genome-wide deleterious mutation rate of 2, and 23 chromosomes with 50 linkage blocks per  
240 chromosome. Any combinations of beneficial mutation rate and mean heterozygote effect size below the  
241 black line produce net degradation. Red dashed lines show plausible upper and lower estimates of the  
242 mean effect size of new beneficial mutations in humans that we chose *a priori*.

243

244 The reason that such low beneficial mutation rates are sufficient for population persistence is that each  
245 beneficial mutation that fixes has a much greater magnitude selection coefficient than each deleterious  
246 mutation that fixes (Figure 2). Beneficial fixations are larger on average than new beneficial mutations,  
247 and deleterious fixations are much smaller on average than new deleterious mutations. Even in  
248 simulations that improve in fitness on average, deleterious fixations outnumber beneficial fixations.

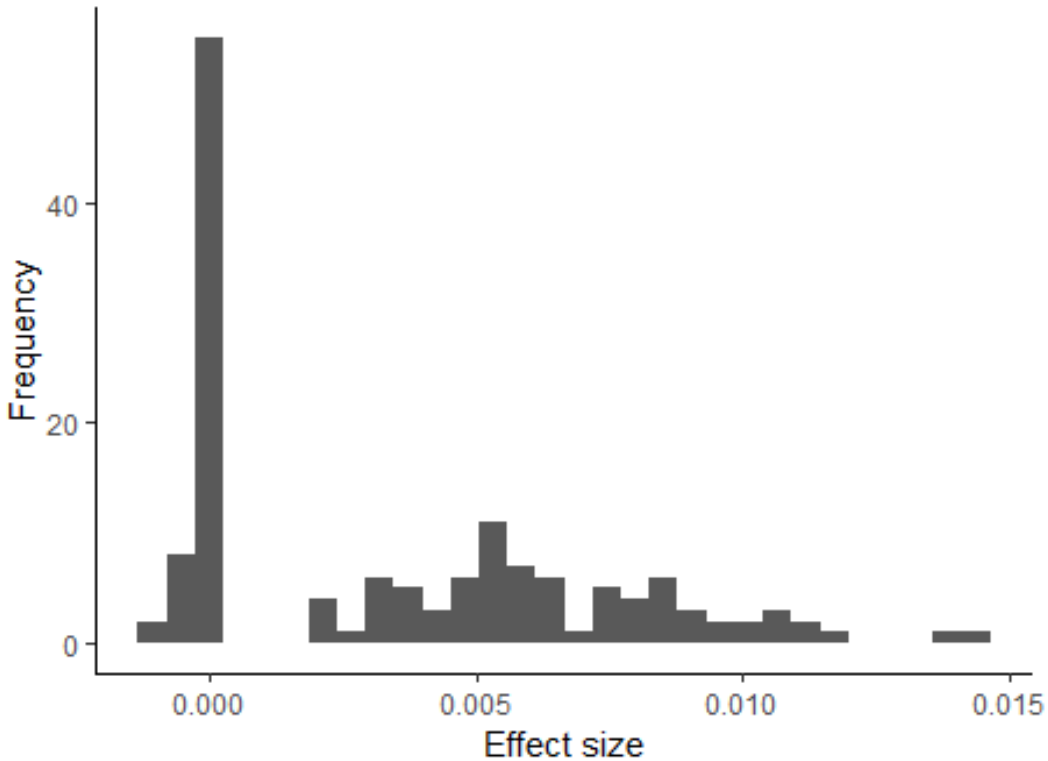

249

250 **Figure 2. Effect sizes of fixed beneficial and deleterious mutations are strongly asymmetrical.** The

251 distribution of effect sizes of fixed mutations is shown after 5000 generations, in a population of  $N =$

252 20,000 with individuals having 23 chromosomes, 50 linkage blocks per chromosome, with a beneficial

253 mutation rate of 0.002 per generation and mean beneficial effect size of 0.0025.

254

255 We next consider the net fitness flux available for adaptation to a changing environment, above and

256 beyond that required to counterbalance Ohta's ratchet. Figure 3A shows how baseline ( $U_d = 0$ )

257 adaptation rate depends on both  $U_b$  and  $\bar{s}_b$  within our parameter value range. Figures 3B-D show how

258 adaptation slows in the presence of  $U_d$  of 2, 5, and 10. Resistance to degradation remains reasonably

259 robust, but the net fitness flux available for adaptation to a changing environment falls by ~13%, ~26%,

260 and ~39%, respectively.

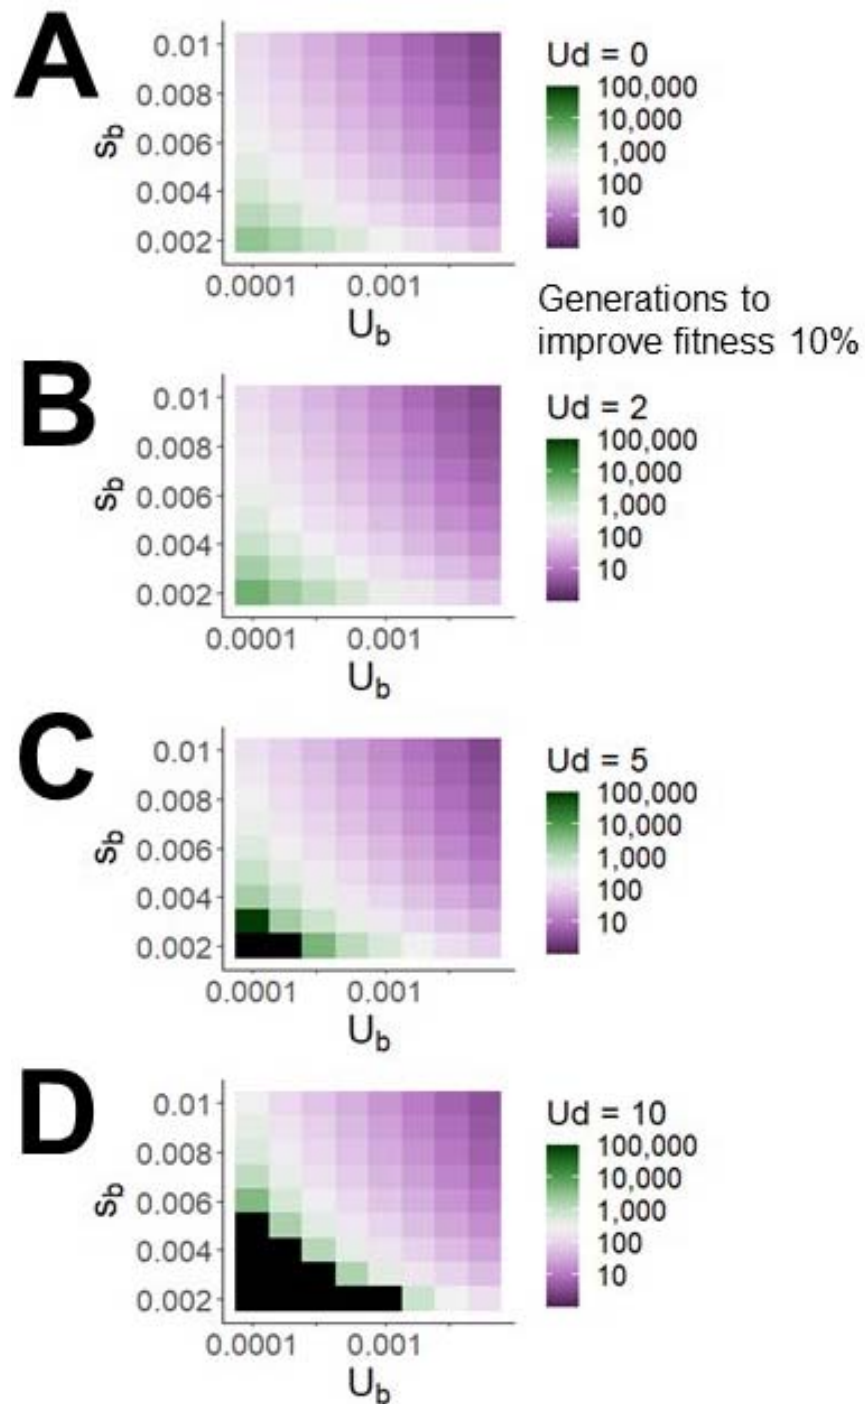

261

262 **Figure 3.** Deleterious mutations appreciably but modestly slow adaptation, visualized as the number of

263 generations required for population mean fitness to increase by 10%. Black boxes indicate simulations

264 with net fitness flux  $< 0$ .

265

266 Population geneticists have raised concerns about the increase in mutation rate (Lynch, 2016; Muller,  
267 1950), in particular due to increased age at paternity (Crow, 1997). The mean paternal age in the U.S.  
268 increased from 27.4 to 30.9 years of age between 1972 and 2015 (Khandwala et al., 2017; Kong et al.,  
269 2012), which is expected to correspond to a 12 percent increase in mutation rate. We simulated a  
270 corresponding increase the mutation rate for both deleterious and beneficial mutations of 10 percent, for a  
271 reference population with  $N = 20,000$ ,  $U_b = 0.002$ ,  $\bar{s}_b = 0.0025$  and all other parameters the same as in  
272 Figure 1. Surprisingly, populations with increased mutation rates took only 127 generations to increase  
273 their fitness by 10%, compared to 151 generations for the baseline population. In other words, because  
274 beneficial fitness flux is more sensitive to  $U_b$  than deleterious fitness flux is to  $U_d$ , increasing the total  
275 mutation rate helps the population adapt faster. The counter-intuitively increased rate of adaptation  
276 directly contradicts dysgenic fears about the consequences of elevated mutation rates on mean population  
277 fitness load.

278 While high human  $U_d \sim 2 - 10$  has only a moderate impact in reducing adaptation rate by 13-39%, its  
279 impact on variance in load among individuals within a population (Figure 5) is substantial. Perhaps  
280 unsurprisingly in light of Fisher's Fundamental Theorem, high steady state variance in fitness among  
281 individuals within a population seems to be an inevitable consequence of high  $U_d$ . With fitness being log-  
282 normally distributed, Figure 5 expresses this variance in terms of the fold-difference between two  
283 individuals that are one standard deviation apart. This variance is relatively insensitive to  $s_b$  and  $U_b$ , but  
284 depends dramatically on  $U_d$ . Figure 5 suggests that differences in deleterious load cause two randomly  
285 sampled humans to have a typical difference in fitness (in the historical human environment) of 15%-  
286 40%.

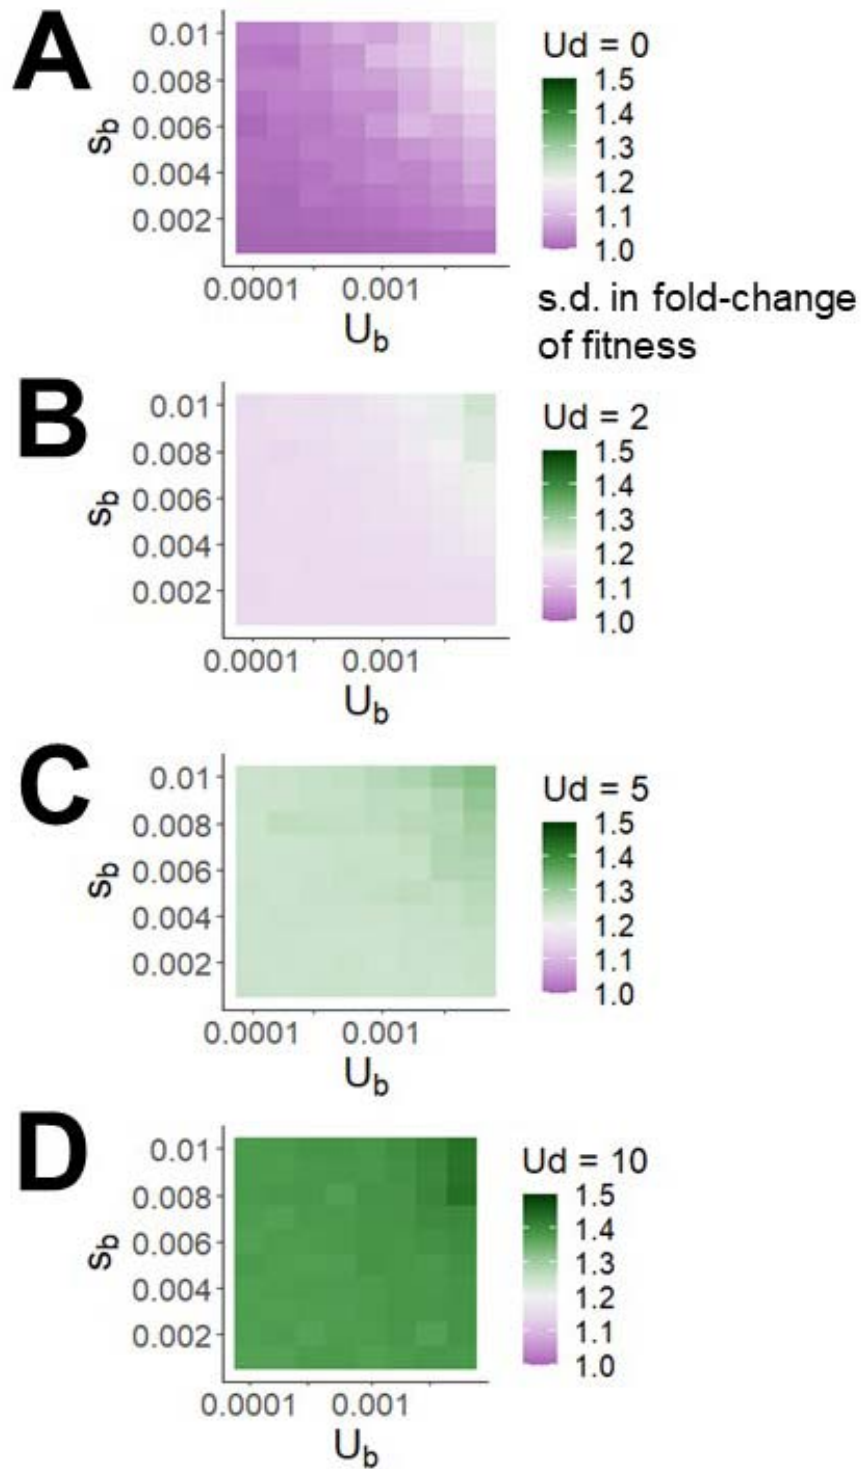

287

288 **Figure 5.** Higher deleterious mutation rates result in substantially more within-population variation in

289 fitness at the end of a simulation, shown here as the standard deviation of fold-difference in fitness.

290 Beneficial parameters have little effect on within-population variation in fitness, increasing it mostly only  
291 at the highest beneficial mutation rates and mean effect sizes we consider.

292

## 293 **Discussion**

294 We address the puzzle of how populations persist given the threat posed by realistically high deleterious  
295 mutation rates. Unlike many previous solutions, we allow that many slightly deleterious mutations do in  
296 fact accumulate (Ohta's ratchet), but argue that this does not lead to population deterioration because a  
297 smaller number of beneficial fixations of greater size successfully counteracts many more small-effect  
298 deleterious fixations. We demonstrate the plausibility of this asymmetric compensation scenario under  
299 realistic values for deleterious mutation rate and sizes, recombination rate, and beneficial mutation size,  
300 and conservative values for the beneficial mutation rate. While population persistence is achieved, the  
301 need to counterbalance deleterious mutations does exact an appreciable toll in terms of a 13-39%  
302 reduction in the speed of adaptation to a changing environment. Our model of realistic deleterious  
303 mutation rates logically entails high variance in fitness (in ancestral environments) within human  
304 populations.

305 While our explanation for population viability requires only conservatively low beneficial mutation rates,  
306 detailed balance would require much higher  $U_b$ . E.g. in an asexual model with  $U_d = 2$ ,  $s = 0.01$ , and  
307  $N = 10,000$ , an analytic approximation suggests that more than 30% of new non-neutral mutations would  
308 need to be beneficial to counteract deleterious load (Goyal et al., 2012), which is implausibly high. As  
309 reviewed in the Introduction, solutions that ignore the fundamentally damaging nature of mutations at the  
310 molecular level, e.g. to focus instead on quantitative traits, involve unrealistically high beneficial  
311 mutation rates.

312 Synergistic epistasis has often been invoked as the solution to mutation load and its accumulation, but  
313 most models invoke a quantitatively extreme form of synergistic epistasis, truncation selection (Crow &



314 Kimura, 1979; Kondrashov, 1982). However, empirical assays of *de novo* deleterious mutations in bacteria  
315 and eukaryotic microbes do not show any synergistic epistasis on average (Elena & Lenski, 1997; Kouyos  
316 et al., 2007), let alone truncation selection. Worse, mutation accumulation experiments often show  
317 decreases in the rate of decay of fitness, consistent with antagonistic epistasis among deleterious  
318 mutations (Francisca & F., 2007; Maisnier-Patin et al., 2005; Perfeito et al., 2014). On the other hand,  
319 experimental evolution studies consistently find diminishing returns epistasis (which corresponds to  
320 synergistic epistasis if viewed from the perspective of deleterious mutations) between new beneficial  
321 mutations (e.g. (Barrick et al., 2009)). These apparently contradictory observations can be reconciled in  
322 multiple ways. One hypothesis is that mutations have massively multidimensional interactions across the  
323 genome and a given mutation's fitness effects are uncorrelated across interactions (idiosyncratic epistasis  
324 (Lyons et al., 2020)). Another hypothesis is that mutational effects are multiplicative (or antagonistic or  
325 idiosyncratic) between functional modules, while being synergistic within modules (Rice, 1998; Wei &  
326 Zhang, 2019). Theory has not yet been developed to show whether these more nuanced forms of epistasis,  
327 compatible with data, could purge mutation load fast enough to avoid population degradation.

328 Sexual selection might also assist with purging load (Grieshop et al., 2021; Whitlock & Agrawal, 2009).  
329 While human monogamy reduces the scope for sexual selection, increased variance in fitness caused by  
330 assortative mating under mutual mate choice might still help prevent mutational degradation (Hooper &  
331 Miller, 2008; Kvarnemo, 2018).

332 Our hypothesis of asymmetric deleterious and beneficial fixations parallels known features of molecular  
333 adaptation. For examples, many mutations that each jeopardize the stable folding of a protein can be  
334 ameliorated at once by the evolution of chaperones (Fares et al., 2002; Gros & Tenaillon, 2009). Many  
335 poorly splicing introns can be ameliorated by the evolution of a better spliceosome (Wu & Hurst, 2015).

336 A pattern of many small mutations, each of which cannot be effectively cleared, being counteracted by  
337 compensatory mutations with global effects, has previously been predicted by drift barrier theory (Fares



355 in the opposite direction, i.e. from  $U_d$  to  $N_e$ . Mutational meltdown (Lande, 1994; Lynch et al., 1995) is  
356 shown for completeness (green), since most of its elements are already invoked.

357

358 Our results suggest a shift in perspective, placing causal emphasis on a high deleterious mutation rate  
359 instead of on a low census population size. Indeed, a mutational ratchet cycle (Figure 6, orange) can occur  
360 even when census population size is high. First, a sufficiently high deleterious mutation rate accelerates  
361 Ohta's ratchet (the inevitable accumulation of slightly deleterious mutations), because background  
362 selection (among unlinked sites) substantially reduces  $N_e$  once  $U_d > 1$  (Charlesworth, 2012; Matheson &  
363 Masel, 2023). As with drift barrier theory, the resulting deluge of slightly deleterious fixations increases  
364 genome size, but the feedback loop from there does not go through census  $N$ . Instead, larger genomes  
365 create a larger target size for deleterious mutations, directly increasing  $U_d$ .

366 The mutational ratchet described above (Figure 6 orange) drives  $U_d$  up to a high enough level to power  
367 the complexity ratchet (Figure 6, pink) that is the focus of this manuscript. Similarly to drift barrier  
368 theory, molecular complexity ratchets up when slightly deleterious mutations cannot be purged or  
369 reversed in a manner that achieves detailed balance, but must instead be compensated for by large effect  
370 changes that frequently occur at a higher level of organization. However, our view in Figure 6 (orange  
371 and pink) bypasses the census population size and ecological factors that are central to the drift barrier  
372 view (blue). This difference is made clear by the conditions required for each view. The drift barrier view  
373 requires low  $N$  but can occur at low  $U_d$  so long as  $sN_e$  is low. Our view requires  $U_d > 1$  and can occur  
374 even for high census  $N$ .

375 Only some populations, like bacteria, are able to achieve a detailed balance solution to load problems that  
376 enables them to retain simple, efficient genomes. Previous hypotheses have focused on the size of such  
377 populations as the crucial divider between species that are able to purge load within a small, simple  
378 genome vs. species forced into ratcheting molecular complexity in search of innovative molecular  
379 solutions to stay ahead of perpetual degradation. But large bacterial populations also have deleterious

380 mutation rates below 1, which provides an alternative explanation as to how they maintain streamlined  
381 genomes. The pressure of mutation load might therefore be a primary driver behind molecular complexity  
382 across the entire tree of life.

383 Understanding how mutation load might be stabilized in humans and similar species is a precondition for  
384 addressing a long-standing concern of geneticists: that load might be increasing in modern humans  
385 because of recent changes to human lifestyles or technology. For example, if mutation rate, beginning  
386 already at a critically high level, increases further due to increased paternal age, or if selection against  
387 deleterious mutations is relaxed due to modern medicine, the perception has been that load should  
388 increase, potentially with disastrous consequences (Crow, 1997; Lynch, 2016). Intriguingly, our results  
389 suggest that the approximate increase in mutation rates in human populations due to increased paternal  
390 age have the opposite effect, improving rather than degrading population mean fitness.

391 However, high  $U_d$  has profound consequences for understanding within-population differences among  
392 individuals. While a genotype whose load used to cause a ~30% reduction in fitness in ancient human  
393 environments might now have a lesser impact on fitness, it likely still has a significant impact on health.  
394 Indeed, variation in self-reported health has a substantial genetic component (Romeis et al., 2000), and  
395 load, as assessable from whole-genome sequencing, can be used to predict medically relevant phenotypes  
396 (Fiziev et al., 2023; Vy et al., 2021). High genetic variance among individuals is a hidden confounding  
397 variable in a vast range of studies (Harden, 2021), including many studies of human health. Our  
398 theoretical assessment implies necessarily high variance in human mutation load. This should trigger a  
399 significant reassessment across all public health studies grounded in correlational analysis (Harden,  
400 2021).

401 We have shown that populations are able to survive the constant accumulation of mildly deleterious  
402 mutations (Ohta's ratchet) by acquiring a smaller number of larger-effect beneficial mutations. Mutation  
403 load may therefore not threaten population persistence, but this does still suggest that load is a crucial

404 evolutionary factor with diverse effects. These include driving the evolution of molecular and organismal  
405 complexity, and maintaining high rates of fitness variance within populations.

#### 406 **Code Availability**

407 Simulation code available at [github.com/MaselLab/MutationLoad](https://github.com/MaselLab/MutationLoad).

#### 408 **Acknowledgements**

409 This work was supported by the John Templeton Foundation [62028] and NIH Grant GM084905. Figure  
410 6 was created by Jennifer Yamnitz.

#### 411 **Literature Cited**

- 412 Agrawal, A. F., & Whitlock, M. C. (2011). Inferences About the Distribution of Dominance Drawn From  
413 Yeast Gene Knockout Data. *Genetics*, *187*(2), 553–566.  
414 <https://doi.org/10.1534/genetics.110.124560>
- 415 Agrawal, A. F., & Whitlock, M. C. (2012). Mutation Load: The Fitness of Individuals in Populations Where  
416 Deleterious Alleles Are Abundant. *Annu. Rev. Ecol. Evol. Syst*, *43*, 115–135.  
417 <https://doi.org/10.1146/annurev-ecolsys-110411-160257>
- 418 Altshuler, D., Daly, M. J., & Lander, E. S. (2008). Genetic mapping in human disease. *Science*, *322*(5903),  
419 881–888. <https://doi.org/10.1126/science.1156409>
- 420 Assaf, Z. J., Petrov, D. A., & Blundell, J. R. (2015). Obstruction of adaptation in diploids by recessive,  
421 strongly deleterious alleles. *Proceedings of the National Academy of Sciences of the United States*  
422 *of America*, *112*(20), E2658–E2666. <https://doi.org/10.1073/pnas.1424949112>
- 423 Awadalla, P., Gauthier, J., Myers, R. A., Casals, F., Hamdan, F. F., Griffing, A. R., Côté, M., Henrion, E.,  
424 Spiegelman, D., Tarabeux, J., Piton, A., Yang, Y., Boyko, A., Bustamante, C., Xiong, L., Rapoport, J. L.,  
425 Addington, A. M., Delisi, J. L. E., Krebs, M. O., ... Rouleau, G. A. (2010). Direct measure of the de  
426 novo mutation rate in autism and schizophrenia cohorts. *American Journal of Human Genetics*,  
427 *87*(3), 316–324. <https://doi.org/10.1016/j.ajhg.2010.07.019>
- 428 Barrick, J. E., Yu, D. S., Yoon, S. H., Jeong, H., Oh, T. K., Schneider, D., Lenski, R. E., & Kim, J. F. (2009).  
429 Genome evolution and adaptation in a long-term experiment with *Escherichia coli*. *Nature*,  
430 *461*(7268), 1243–1247. <https://doi.org/10.1038/nature08480>
- 431 Baumdicker, F., Bisschop, G., Goldstein, D., Gower, G., Ragsdale, A. P., Tsambos, G., Zhu, S., Eldon, B.,  
432 Ellerman, E. C., Galloway, J. G., Gladstein, A. L., Gorjanc, G., Guo, B., Jeffery, B., Kretzschmar, W.,  
433 W., Lohse, K., Matschiner, M., Nelson, D., Pope, N. S., ... Kelleher, J. (2022). Efficient ancestry and  
434 mutation simulation with msprime 1.0. *Genetics*, *220*(3), iyab229.  
435 <https://doi.org/10.1093/genetics/iyab229>

- 436 Belmont, J. W., Boudreau, A., Leal, S. M., Hardenbol, P., Pasternak, S., Wheeler, D. A., Willis, T. D., Yu, F.,  
437 Yang, H., Gao, Y., Hu, H., Hu, W., Li, C., Lin, W., Liu, S., Pan, H., Tang, X., Wang, J., Wang, W., ...  
438 Stewart, J. (2005). A haplotype map of the human genome. *Nature*, *437*(7063), 1299–1320.  
439 <https://doi.org/10.1038/nature04226>
- 440 Bertram, J., & Masel, J. (2019). Density-dependent selection and the limits of relative fitness. *Theoretical*  
441 *Population Biology*, *129*, 81–92. <https://doi.org/10.1016/j.tpb.2018.11.006>
- 442 Charlesworth, B. (2012). The Effects of Deleterious Mutations on Evolution at Linked Sites. *Genetics*,  
443 *190*(1), 5–22. <https://doi.org/10.1534/genetics.111.134288>
- 444 Charlesworth, B. (2013). Why we are not dead one hundred times over. *Evolution*, *67*(11), 3354–3361.  
445 <https://doi.org/10.1111/evo.12195>
- 446 Coop, G., Wen, X., Ober, C., Pritchard, J. K., & Przeworski, M. (2008). High-resolution mapping of  
447 crossovers reveals extensive variation in fine-scale recombination patterns among humans.  
448 *Science*, *319*(5868), 1395–1398. <https://doi.org/10.1126/science.1151851>
- 449 Crow, J. F. (1997). The high spontaneous mutation rate: is it a health risk? *Proceedings of the National*  
450 *Academy of Sciences of the United States of America*, *94*(16), 8380–8386.  
451 <https://doi.org/10.1073/pnas.94.16.8380>
- 452 Crow, J. F., & Kimura, M. (1979). Efficiency of truncation selection. *Proceedings of the National Academy*  
453 *of Sciences USA*, *76*(1), 396–399. <https://doi.org/10.1073/pnas.76.1.396>
- 454 Elena, S. F., & Lenski, R. E. (1997). Test of synergistic interactions among deleterious mutations in  
455 bacteria. *Nature*, *390*(6658), 395–398. <https://doi.org/10.1038/37108>
- 456 Fares, M. A., Ruiz-González, M. X., Moya, A., Elena, S. F., & Barrio, E. (2002). GroEL buffers against  
457 deleterious mutations. *Nature*, *417*(6887), 398. <https://doi.org/10.1038/417398a>
- 458 Fenwick, P. M. (1994). A new data structure for cumulative frequency tables. *Software: Practice and*  
459 *Experience*, *24*(3), 327–336. <https://doi.org/10.1002/spe.4380240306>
- 460 Fisher, R. (1930). *The Genetical Theory of Natural Selection*. Clarendon Press.
- 461 Fiziev, P. P., McRae, J., Ulirsch, J. C., Dron, J. S., Hamp, T., Yang, Y., Wainschtein, P., Ni, Z., Schraiber, J. G.,  
462 Gao, H., Cable, D., Field, Y., Aguet, F., Fasnacht, M., Metwally, A., Rogers, J., Marques-Bonet, T.,  
463 Rehm, H. L., O'Donnell-Luria, A., ... Farh, K. K.-H. (2023). Rare penetrant mutations confer severe  
464 risk of common diseases. *Science*, *380*(6648), eabo1131. <https://doi.org/10.1126/science.abo1131>
- 465 Francisca, de la I., & Elena, S. F. (2007). Fitness Declines in Tobacco Etch Virus upon Serial Bottleneck  
466 Transfers. *Journal of Virology*, *81*(10), 4941–4947. <https://doi.org/10.1128/jvi.02528-06>
- 467 Frank, S. A. (2007). Maladaptation and the paradox of robustness in evolution. *PLoS ONE*, *2*(10).  
468 <https://doi.org/10.1371/journal.pone.0001021>
- 469 Good, B. H., & Desai, M. M. (2014). Deleterious passengers in adapting populations. *Genetics*, *198*(3),  
470 1183–1208. <https://doi.org/10.1534/genetics.114.170233>

- 471 Good, B. H., Walczak, A. M., Neher, R. A., & Desai, M. M. (2014). Genetic Diversity in the Interference  
472 Selection Limit. *PLoS Genetics*, *10*(3). <https://doi.org/10.1371/journal.pgen.1004222>
- 473 Goyal, S., Balick, D. J., Jerison, E. R., Neher, R. A., Shraiman, B. I., & Desai, M. M. (2012). Dynamic  
474 Mutation–Selection Balance as an Evolutionary Attractor. *Genetics*, *191*, 1309–1319.  
475 <https://doi.org/10.1534/genetics.112.141291>
- 476 Gravel, S. (2016). When is selection effective? *Genetics*, *203*(1), 451–462.  
477 <https://doi.org/10.1534/genetics.115.184630>
- 478 Grieshop, K., Maurizio, P. L., Arnqvist, G., & Berger, D. (2021). Selection in males purges the mutation  
479 load on female fitness. *Evolution Letters*, *5*(4), 328–343. <https://doi.org/10.1002/evl3.239>
- 480 Gros, P.-A., & Tenaillon, O. (2009). Selection for Chaperone-Like Mediated Genetic Robustness at Low  
481 Mutation Rate: Impact of Drift, Epistasis and Complexity. *Genetics*, *182*(2), 555–564.  
482 <https://doi.org/10.1534/genetics.108.099366>
- 483 Haag-Liautard, C., Dorris, M., Maside, X., Macaskill, S., Halligan, D. L., Charlesworth, B., & Keightley, P. D.  
484 (2007). Direct estimation of per nucleotide and genomic deleterious mutation rates in *Drosophila*.  
485 *Nature*, *445*(7123), 82–85. <https://doi.org/10.1038/nature05388>
- 486 Haldane, J. (1927). A mathematical theory of natural and artificial selection, part V: selection and  
487 mutation. *Proc. Camb. Philos. Soc.*, *26*(0), 838–844.
- 488 Haldane, J. (1937). The Effect of Variation on Fitness. *The American Naturalist*, *71*(735), 337–349.
- 489 Haller, B. C., & Messer, P. W. (2017). SLiM 2: Flexible, interactive forward genetic simulations. *Molecular*  
490 *Biology and Evolution*, *34*(1), 230–240. <https://doi.org/10.1093/molbev/msw211>
- 491 Haller, B. C., & Messer, P. W. (2022). SLiM 4: Multispecies Eco-Evolutionary Modeling. *The American*  
492 *Naturalist*, *201*(5), E127–E139. <https://doi.org/10.1086/723601>
- 493 Harden, K. P. (2021). *The Genetic Lottery: Why DNA Matters For Social Equality*. Princeton University  
494 Press.
- 495 Hill, W., & Robertson, A. (1966). The effect of linkage on limits to artificial selection. *Genetical Research*,  
496 *8*(3), 269–294. <https://doi.org/10.1017/S001667230800949X>
- 497 Hooper, P. L., & Miller, G. F. (2008). Mutual mate choice can drive costly signaling even under perfect  
498 monogamy. *Adaptive Behavior*, *16*(1), 53–70. <https://doi.org/10.1177/1059712307087283>
- 499 Karczewski, K. J., Francioli, L. C., Tiao, G., Cummings, B. B., Alföldi, J., Wang, Q., Collins, R. L., Laricchia, K.  
500 M., Ganna, A., Birnbaum, D. P., Gauthier, L. D., Brand, H., Solomonson, M., Watts, N. A., Rhodes,  
501 D., Singer-Berk, M., England, E. M., Seaby, E. G., Kosmicki, J. A., ... Daly, M. J. (2020). The mutational  
502 constraint spectrum quantified from variation in 141,456 humans. *Nature*, *581*(7809), 434–443.  
503 <https://doi.org/10.1038/s41586-020-2308-7>
- 504 Kelleher, J., Thornton, K. R., Ashander, J., & Ralph, P. L. (2018). Efficient pedigree recording for fast  
505 population genetics simulation. *PLoS Computational Biology*, *14*(11), e1006581.

- 506 Khandwala, Y. S., Zhang, C. A., Lu, Y., & Eisenberg, M. L. (2017). The age of fathers in the USA is rising: An  
507 analysis of 168 867 480 births from 1972 to 2015. *Human Reproduction*, *32*(10), 2110–2116.  
508 <https://doi.org/10.1093/humrep/dex267>
- 509 Kim, B., Huber, C., & Lohmueller, K. (2017). Inference of the Distribution of Selection Coefficients for  
510 New Nonsynonymous Mutations Using Large Samples. *Genetics*, *206*, 345–361.  
511 <https://doi.org/10.1534/genetics.116.197145/-/DC1.1>
- 512 Kimura, M. (1962). On the probability of fixation of mutant genes in a population. *Genetics*, *47*(391),  
513 713–719. <https://doi.org/10.1007/BF01418872>
- 514 Kimura, M., & Maruyama, T. (1966). THE MUTATIONAL LOAD WITH EPISTATIC GENE INTERACTIONS IN  
515 FITNESS. *Genetics*, *54*(6), 1337–1351. <https://doi.org/10.1093/genetics/54.6.1337>
- 516 Koch, E., & Novembre, J. (2017). A temporal perspective on the interplay of demography and selection  
517 on deleterious variation in humans. *G3: Genes, Genomes, Genetics*, *7*(3), 1027–1037.  
518 <https://doi.org/10.1534/g3.117.039651>
- 519 Koelle, K., & Rasmussen, D. A. (2015). The effects of a deleterious mutation load on patterns of influenza  
520 A/H3N2's antigenic evolution in humans. *ELife*, *4*(September), e07361.  
521 <https://doi.org/10.7554/eLife.07361>
- 522 Kondrashov, A. S. (1982). Selection against harmful mutations in large sexual and asexual populations.  
523 *Genetics Research*, *40*(3), 325–332. <https://doi.org/DOI:10.1017/S0016672300019194>
- 524 Kondrashov, A. S. (1995a). Contamination of the genome by very slightly deleterious mutations: why  
525 have we not died 100 times over? *Journal of Theoretical Biology*, *175*(4), 583–594.  
526 <https://doi.org/10.1006/jtbi.1995.0167>
- 527 Kondrashov, A. S. (1995b). Dynamics of unconditionally deleterious mutations: Gaussian approximation  
528 and soft selection. *Genetical Research*, *65*(2), 113–121.  
529 <https://doi.org/10.1017/S0016672300033139>
- 530 Kondrashov, A. S. (2017). *Crumbling Genome: The Impact of Deleterious Mutations on Humans*. John  
531 Wiley & Sons, Inc.
- 532 Kong, A., Frigge, M. L., Masson, G., Besenbacher, S., Sulem, P., Magnusson, G., Gudjonsson, S. A.,  
533 Sigurdsson, A., Jonasdottir, A., Jonasdottir, A., Wong, W. S. W., Sigurdsson, G., Walters, G. B.,  
534 Steinberg, S., Helgason, H., Thorleifsson, G., Gudbjartsson, D. F., Helgason, A., Magnusson, O. T., ...  
535 Stefansson, K. (2012). Rate of de novo mutations and the importance of father-s age to disease  
536 risk. *Nature*, *488*(7412), 471–475. <https://doi.org/10.1038/nature11396>
- 537 Kouyos, R. D., Silander, O. K., & Bonhoeffer, S. (2007). Epistasis between deleterious mutations and the  
538 evolution of recombination. *Trends in Ecology and Evolution*, *22*(6), 308–315.  
539 <https://doi.org/10.1016/j.tree.2007.02.014>
- 540 Kvarnemo, C. (2018). Why do some animals mate with one partner rather than many? A review of  
541 causes and consequences of monogamy. *Biological Reviews*, *93*(4), 1795–1812.  
542 <https://doi.org/https://doi.org/10.1111/brv.12421>



- 543 Kyriazis, C. C., Wayne, R. K., & Lohmueller, K. E. (2021). Strongly deleterious mutations are a primary  
544 determinant of extinction risk due to inbreeding depression. *Evolution Letters*, 5(1), 33–47.  
545 <https://doi.org/10.1002/evl3.209>
- 546 Lande, R. (1994). RISK OF POPULATION EXTINCTION FROM FIXATION OF NEW DELETERIOUS  
547 MUTATIONS. *Evolution*, 48(5), 1460–1469. <https://doi.org/10.1111/j.1558-5646.1994.tb02188.x>
- 548 Lesecque, Y., Keightley, P. D., & Eyre-Walker, A. (2012). A resolution of the mutation load paradox in  
549 humans. *Genetics*, 191(4), 1321–1330. <https://doi.org/10.1534/genetics.112.140343>
- 550 Lohmueller, K. E., Indap, A. R., Schmidt, S., Boyko, A. R., Hernandez, R. D., Hubisz, M. J., Sninsky, J. J.,  
551 White, T. J., Sunyaev, S. R., Nielsen, R., Clark, A. G., & Bustamante, C. D. (2008). Proportionally  
552 more deleterious genetic variation in European than in African populations. *Nature*, 451(7181),  
553 994–997. <https://doi.org/10.1038/nature06611>
- 554 Lynch, M. (2007). *The Origins of Genome Architecture*. Sinauer Associates.
- 555 Lynch, M. (2010a). Evolution of the mutation rate. *Trends in Genetics*, 26(8), 345–352.  
556 <https://doi.org/10.1016/j.tig.2010.05.003>
- 557 Lynch, M. (2010b). Rate, molecular spectrum, and consequences of human mutation. *Proceedings of the*  
558 *National Academy of Sciences of the United States of America*, 107(3), 961–968.  
559 <https://doi.org/10.1073/pnas.0912629107>
- 560 Lynch, M. (2016). Mutation and human exceptionalism: Our future genetic load. *Genetics*, 202(3), 869–  
561 875. <https://doi.org/10.1534/genetics.115.180471>
- 562 Lynch, M., Conery, J., & Burger, R. (1995). Mutational Meltdowns in Sexual Populations. *Evolution*, 49(6),  
563 1067–1080.
- 564 Lyons, D. M., Zou, Z., Xu, H., & Zhang, J. (2020). Idiosyncratic epistasis creates universals in mutational  
565 effects and evolutionary trajectories. *Nature Ecology & Evolution*, 4(12), 1685–1693.  
566 <https://doi.org/10.1038/s41559-020-01286-y>
- 567 Maisnier-Patin, S., Roth, J. R., Fredriksson, Å., Nyström, T., Berg, O. G., & Andersson, D. I. (2005).  
568 Genomic buffering mitigates the effects of deleterious mutations in bacteria. *Nature Genetics*,  
569 37(12), 1376–1379. <https://doi.org/10.1038/ng1676>
- 570 Matheson, J., Exposito-Alonso, M., & Masel, J. (2023). The cost of selection in selective deaths paid out  
571 of reproductive excess. *BioRxiv*, 2021.11.01.466728. <https://doi.org/10.1101/2021.11.01.466728>
- 572 Matheson, J., & Masel, J. (2023). Background selection from unlinked sites causes non-independent  
573 evolution of deleterious mutations. *BioRxiv*, 2022.01.11.475913.  
574 <https://doi.org/10.1101/2022.01.11.475913>
- 575 Muller, H. (1950). Our load of mutations. *American Journal of Human Genetics*, 2(2), 111–176.  
576 <https://doi.org/10.1007/BF00139458>
- 577 Mustonen, V., & Lässig, M. (2010). Fitness flux and ubiquity of adaptive evolution. *Proceedings of the*  
578 *National Academy of Sciences of the United States of America*, 107(9), 4248–4253.  
579 <https://doi.org/10.1073/pnas.0907953107>

- 580 Neher, R. A., Kessinger, T. A., & Shraiman, B. I. (2013). Coalescence and genetic diversity in sexual  
581 populations under selection. *Proceedings of the National Academy of Sciences of the United States*  
582 *of America*, *110*(39), 15836–15841. <https://doi.org/10.1073/pnas.1309697110>
- 583 Ober, C., Hyslop, T., & Hauck, W. W. (1999). Inbreeding effects on fertility in humans: Evidence for  
584 reproductive compensation. *American Journal of Human Genetics*, *64*(1), 225–231.  
585 <https://doi.org/10.1086/302198>
- 586 Ohta, T. (1973). Slightly Deleterious Mutant Substitutions in Evolution. *Nature*, *246*(5428), 96–98.
- 587 Pénisson, S., Singh, T., Sniegowski, P., & Gerrish, P. (2017). Dynamics and fate of beneficial mutations  
588 under lineage contamination by linked deleterious mutations. *Genetics*, *205*(3), 1305–1318.  
589 <https://doi.org/10.1534/genetics.116.194597>
- 590 Perfeito, L., Sousa, A., Bataillon, T., & Gordo, I. (2014). RATES OF FITNESS DECLINE AND REBOUND  
591 SUGGEST PERVASIVE EPISTASIS. *Evolution*, *68*(1), 150–162. <https://doi.org/10.1111/evo.12234>
- 592 Popovic, I., Bergeron, L., Bozec, Y.-M., Waldvogel, A.-M., Howitt, S., Damjanovic, K., Patel, F., Cabrera, M.  
593 G., Worheide, G., Uthicke, S., & Riginos, C. (2023). High germline mutation rates but not extreme  
594 population size outbreaks influence genetic diversity in crown-of-thorns sea stars. *BioRxiv*,  
595 *2023.06.28*. <https://doi.org/10.1101/2023.06.28.546961>
- 596 Pratto, F., Brick, K., Khil, P., Smagulova, F., Petukhova, G. V., & Camerini-Otero, R. D. (2018). Erratum  
597 Recombination initiation maps of individual human genomes (Science DOI:  
598 [10.1126/science.1256442](https://doi.org/10.1126/science.1256442)). *Science*, *362*(6412). <https://doi.org/10.1126/science.aav6294>
- 599 Rajon, E., & Masel, J. (2011). Evolution of molecular error rates and the consequences for evolvability.  
600 *Proceedings of the National Academy of Sciences*, *108*(3), 1082–1087.  
601 <https://doi.org/10.1073/pnas.1012918108>
- 602 Rice, W. R. (1998). Requisite mutational load, pathway epistasis, and deterministic mutation  
603 accumulation in sexual versus asexual populations. *Genetica*, *102/103*, 71–81.
- 604 Roach, J. C., Glusman, G., Smit, A. F. A., Huff, C. D., Shannon, P. T., Rowen, L., Pant, K. P., Goodman, N.,  
605 Shendure, J., Drmanac, R., Jorde, L. B., Hood, L., & Galas, J. (2010). Analysis of Genetic Inheritance  
606 in a Family Quartet by Whole Genome Sequencing. *Science*, *328*(5978), 636–639.  
607 <https://doi.org/10.1126/science.1186802>.Analysis
- 608 Romeis, J. C., Scherrer, J. E., Eisen, S. A., Heath, A. C., Goldberg, J., Lyons, M., Henderson, G., & True, W.  
609 R. (2000). Heritability of Self-Reported Health. *Health Serv Res.*, *35*, 995–1010.
- 610 Ruan, Y., Wang, H., Zhang, L., Wen, H., & Wu, C.-I. (2020). Sex, fitness decline and recombination –  
611 Muller’s ratchet vs. Ohta’s ratchet. *BioRxiv*, *2020.08.06.240713*.  
612 <https://doi.org/10.1101/2020.08.06.240713>
- 613 Simmons, M. J., & Crow, J. F. (1977). MUTATIONS AFFECTING FITNESS IN DROSOPHILA POPULATIONS.  
614 *Annual Review of Genetics*, *11*(1), 49–78. <https://doi.org/10.1146/annurev.ge.11.120177.000405>

- 615 Simons, Y. B., Turchin, M. C., Pritchard, J. K., & Sella, G. (2014). The deleterious mutation load is  
616 insensitive to recent population history. *Nature Genetics*, *46*(3), 220–224.  
617 <https://doi.org/10.1038/ng.2896>
- 618 Sung, W., Ackerman, M. S., Miller, S. F., Doak, T. G., & Lynch, M. (2012). Drift-barrier hypothesis and  
619 mutation-rate evolution. *Proceedings of the National Academy of Sciences*, *109*(45), 18488–18492.  
620 <https://doi.org/10.1073/pnas.1216223109>-  
621 /DCSupplemental.www.pnas.org/cgi/doi/10.1073/pnas.1216223109
- 622 Tenesa, A., Navarro, P., Hayes, B. J., Duffy, D. L., Clarke, G. M., Goddard, M. E., Visscher, P. M., Unit, H.  
623 G., Hospital, W. G., Eh, E., Kingdom, U., & Biology, E. (2007). Recent human effective population  
624 size estimated from linkage disequilibrium. *Cold Spring Harbor Laboratory Press Human*, *2*, 520–  
625 526. <https://doi.org/10.1101/gr.6023607.8>
- 626 Thornton, K. R. (2014). A c++ template library for efficient forward-time population genetic simulation of  
627 large populations. *Genetics*, *198*(1), 157–166. <https://doi.org/10.1534/genetics.114.165019>
- 628 Thornton, K. R. (2019). Polygenic adaptation to an environmental shift: Temporal dynamics of variation  
629 under Gaussian stabilizing selection and additive effects on a single trait. *Genetics*, *213*(December),  
630 1513–1530. <https://doi.org/10.1101/505750>
- 631 Vy, H. M. T., Jordan, D. M., Balick, D. J., & Do, R. (2021). Probing the aggregated effects of purifying  
632 selection per individual on 1,380 medical phenotypes in the UK biobank. *PLoS Genetics*, *17*(1).  
633 <https://doi.org/10.1371/journal.pgen.1009337>
- 634 Wall, J. D., & Pritchard, J. K. (2003). Haplotype blocks and linkage disequilibrium in the human genome.  
635 *Nature Reviews Genetics*, *4*(8), 587–597. <https://doi.org/10.1038/nrg1123>
- 636 Wei, X., & Zhang, J. (2019). Patterns and Mechanisms of Diminishing Returns from Beneficial Mutations.  
637 *Molecular Biology and Evolution*, *36*(5), 1008–1021. <https://doi.org/10.1093/molbev/msz035>
- 638 Weissman, D. B., & Barton, N. H. (2012). Limits to the rate of adaptive substitution in sexual populations.  
639 *PLoS Genetics*, *8*(6). <https://doi.org/10.1371/journal.pgen.1002740>
- 640 Weissman, D. B., & Hallatschek, O. (2014). The rate of adaptation in large sexual populations with linear  
641 chromosomes. *Genetics*, *196*(4), 1167–1183. <https://doi.org/10.1534/genetics.113.160705>
- 642 Whitlock, M. C. (2000). Fixation of new alleles and the extinction of small populations: drift load,  
643 beneficial alleles, and sexual selection. *Evolution*, *54*(6), 1855–1861.  
644 <https://doi.org/10.2144/05384CI01>
- 645 Whitlock, M. C., & Agrawal, A. F. (2009). PURGING THE GENOME WITH SEXUAL SELECTION: REDUCING  
646 MUTATION LOAD THROUGH SELECTION ON MALES. *Evolution*, *63*(3), 569–582.  
647 <https://doi.org/10.1111/j.1558-5646.2008.00558.x>
- 648 Wu, X., & Hurst, L. D. (2015). Why Selection Might Be Stronger When Populations Are Small: Intron Size  
649 and Density Predict within and between-Species Usage of Exonic Splice Associated cis-Motifs.  
650 *Molecular Biology and Evolution*, *32*(7), 1847–1861. <https://doi.org/10.1093/molbev/msv069>

- 651 Xiong, K., Mcentee, J. P., Porfirio, D. J., & Masel, J. (2017). Drift barriers to quality control when genes  
652 are expressed at different levels. *Genetics*, 205(January), 397–407.  
653 <https://doi.org/10.1534/genetics.116.192567>
- 654 Yang, J., Mezouk, S., Baumgarten, A., Buckler, E. S., Guill, K. E., McMullen, M. D., Mumm, R. H., & Ross-  
655 Ibarra, J. (2017). Incomplete dominance of deleterious alleles contributes substantially to trait  
656 variation and heterosis in maize. *PLOS Genetics*, 13(9), e1007019-  
657 <https://doi.org/10.1371/journal.pgen.1007019>
- 658
